# Supplementary material
Source: PubMed Central journal article supplement (PMC2663756)
Supplement: pp.108.134684_1.pdf [file pp.108.134684_1.pdf]

**Supplemental Table 1. Primers used for RT-PCR**

| Gene           | Accession No. | Primer Sequence              |                              |
|----------------|---------------|------------------------------|------------------------------|
|                |               | Forward                      | Reverse                      |
| <i>OFR</i>     | AK072596      | 5'- TGGCTACACGGACTATCCTT -3' | 5'- ATGGAAGTGAGGGTCACTTA -3' |
| <i>OsJMT1</i>  | AK067321      | 5'- GTAATTGCTGCCGAGTACCC -3' | 5'- CAAAACATTTAAGATGGGG -3'  |
| <i>OsSDR</i>   | AK064532      | 5'- GGATGGACCAACCGTTGCT -3'  | 5'- GTGGTATATGTTACACAGC -3'  |
| <i>BBPI</i>    | AK102138      | 5'- CGCTGCCTGGATGGCTACCA -3' | 5'- GAGCGGTGAGCGGTGCGCC -3'  |
| <i>Chl</i>     | AK120809      | 5'- AAGGATGAGCAGAGGAAGGT -3' | 5'- ATTGCAAAGAGAACACAAGA -3' |
| <i>α-amyl</i>  | AK062381      | 5'- AGCCTCATCCTCAACTG -3'    | 5'- AGATATTGGGGTAAAAACA -3'  |
| <i>SCP</i>     | AK064814      | 5'- ATGGCCAGGCTGCAGGTTA -3'  | 5'- CACCAGCCAGCCACCGTTT -3'  |
| <i>Tubulin</i> | AK102560      | 5'- CATGGACATCAAGTTCCA -3'   | 5'- CCGAGTTCGAGATGGTGA -3'   |
